# Supplementary material for: Self-healing and shape-memory solid polymer electrolytes with high mechanical strength facilitated by a poly(vinyl alcohol) matrix
Source: Royal Society of Chemistry journal article supplement (doi:10.1039/c9py01406c), 2019-01-01
Supplement: c9py01406c1.pdf [file c9py01406c1.pdf]

## Self-healing and shape-memory solid polymer electrolytes with high mechanical strength facilitated by a poly(vinyl alcohol) matrix

Ye Hyang Jo, Binghua Zhou, Ke Jiang, Shaoqiao Li, Cai Zuo, Huihui Gan, Dan He\*,  
Xingping Zhou\*, Zhigang Xue\*

*Key Laboratory for Material Chemistry of Energy Conversion and Storage, Ministry of Education, School of Chemistry and Chemical Engineering, Huazhong University of Science and Technology, Wuhan 430074, China.*

Corresponding authors. Tel: +86 27 87793241, Fax: +86 27 87543632.

E-mail address: zgxue@mail.hust.edu.cn (Z. Xue), danneyhe@hust.edu.cn (D. He),  
xpzhou@mail.hust.edu.cn (X. Zhou)

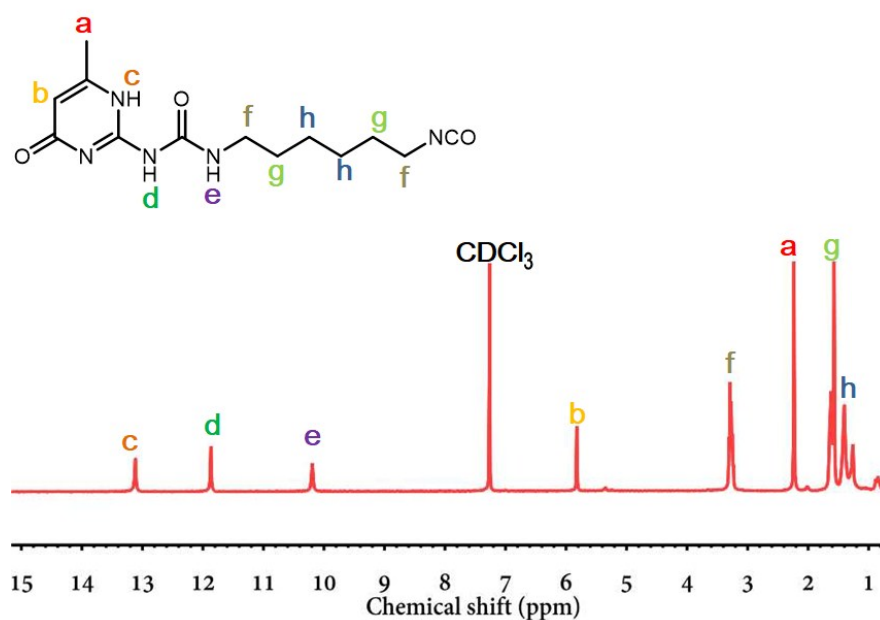

**Fig. S1.**  $^1\text{H}$  NMR spectrum of Upy-NCO.

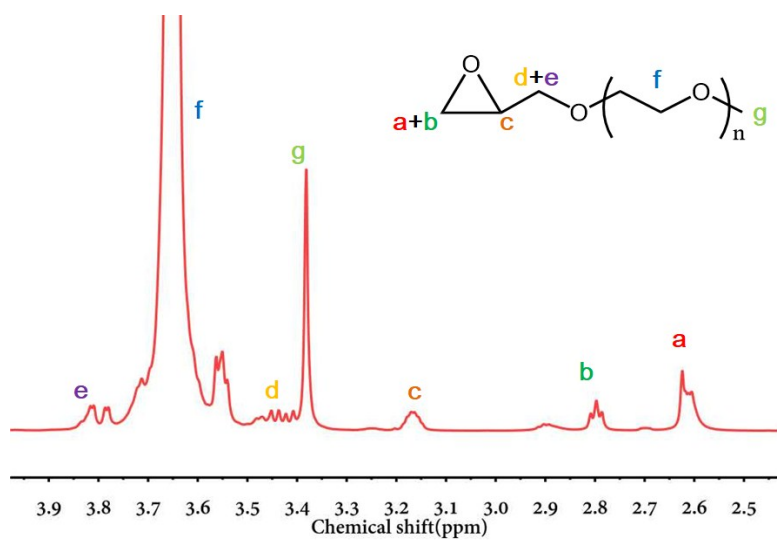

**Fig. S2.**  $^1\text{H}$  NMR spectrum of epoxide functionalized PEG

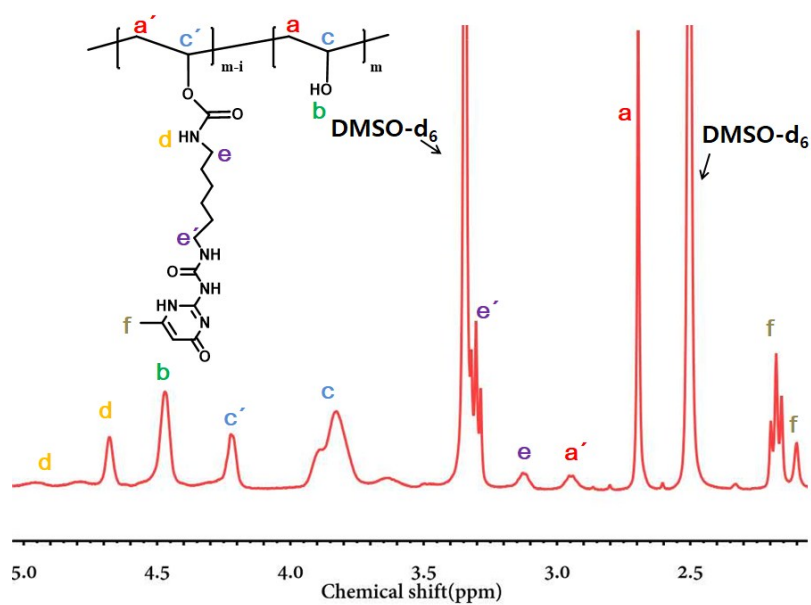

**Fig. S3.**  $^1\text{H}$  NMR spectrum of PVA-Upy.

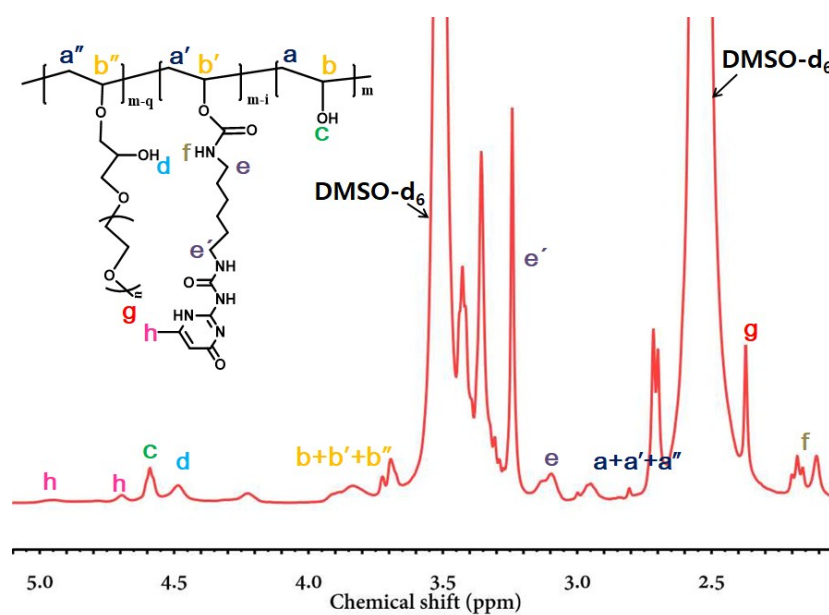

**Fig. S4.**  $^1\text{H}$  NMR spectrum of PVA-UPy-PEG.

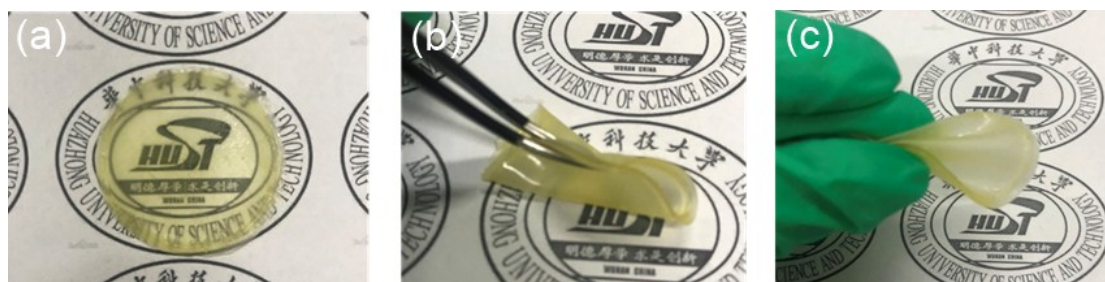

**Fig. S5.** Photograph of PVA-UPy-PEG750 (a), the polymer electrolyte bended once (b) and bended three times (c).

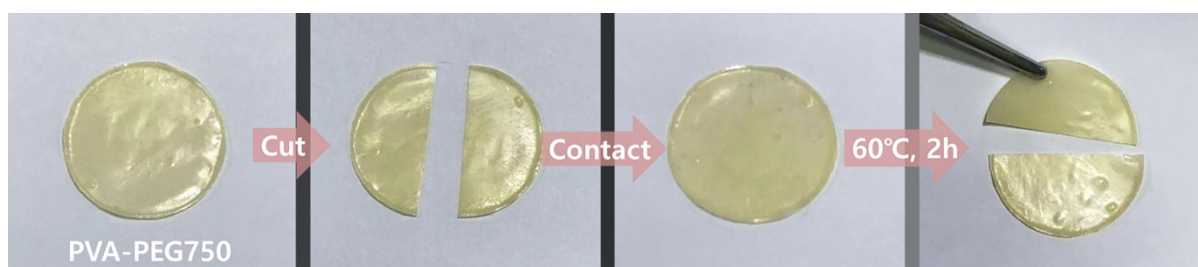

**Fig. S6.** Optical images of self-healing behavior of PVA-PEG750 without UPy units.

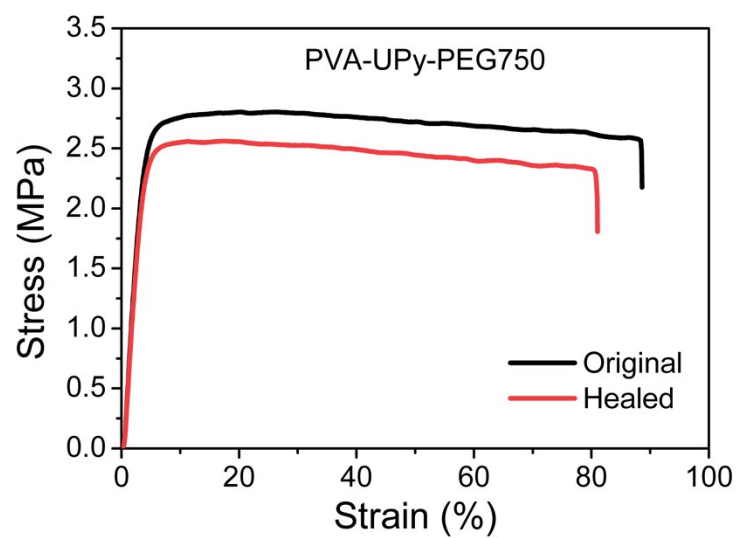

**Fig. S7** Stress-strain curves of the original and healed PVA-UPy-PEG750.

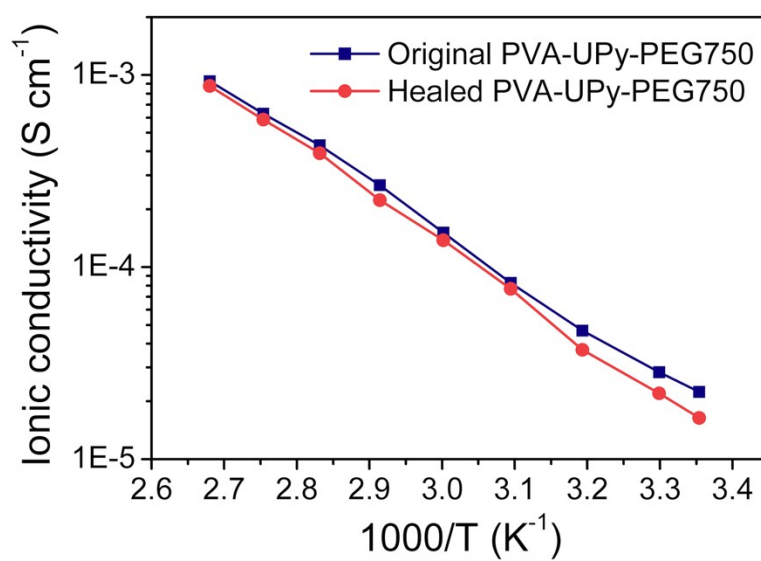

**Fig. S8.** The ionic conductivity of healed SSSPE and original SSSPE.
